# Supplementary material for: Synthesis and characterization of two self-assembled [Cu6Gd3] and [Cu5Dy2] complexes exhibiting the magnetocaloric effect, slow relaxation of magnetization, and anticancer activity
Source: Royal Society of Chemistry journal article supplement (doi:10.1039/d2dt03932j), 2023-01-01
Supplement: d2dt03932j1.pdf [file d2dt03932j1.pdf]

## **Electronic Supporting Information**

### **Synthesis and characterization of two self-assembled [Cu<sub>6</sub>Gd<sub>3</sub>] and [Cu<sub>5</sub>Dy<sub>2</sub>] complexes exhibiting magnetocaloric effect, slow relaxation of magnetization and anticancer activity**

Avik Bhanja<sup>a</sup>, Sangeeta Roy Chaudhuri<sup>a</sup>, Angelos B. Canaj,<sup>b</sup> Shachi Pranjali Vyas,<sup>c</sup> Fabrizio Ortu<sup>d</sup>, Lucy Smythe,<sup>b</sup> Mark Murrie,<sup>b</sup> Ritobrata Goswami,<sup>c</sup> Debashis Ray<sup>\*a</sup>

<sup>a</sup>*Department of Chemistry, Indian Institute of Technology, Kharagpur 721302, India*

<sup>b</sup>*School of Chemistry, University of Glasgow, University Avenue, Glasgow, G12 8QQ, UK*

<sup>c</sup>*School of Bioscience, Indian Institute of Technology, Kharagpur 721302, India*

<sup>d</sup>*School of Chemistry, University of Leicester, LE1 7RH Leicester, UK*

*\*Email: [dray@chem.iitkgp.ac.in](mailto:dray@chem.iitkgp.ac.in)*

## Contents

|                                                                                           |       |
|-------------------------------------------------------------------------------------------|-------|
| 1. Experimental Section.....                                                              | 3-8   |
| 2. Table of earlier reported complexes showing MCE.....                                   | 9     |
| 3. Crystallographic data and refinement details for complexes <b>1-2</b> .....            | 9-10  |
| 4. Powder XRD pattern of complex <b>1</b> and <b>2</b> .....                              | 10    |
| 5. Observed metal ion binding modes of ligand H <sub>2</sub> L.....                       | 10    |
| 6. FT-IR spectra of the complexes <b>1</b> and <b>2</b> .....                             | 11    |
| 7. SHAPE analysis of the metal ion center.....                                            | 11-12 |
| 8. Mean plane analysis and H-bonding connectivity of complex <b>1</b> .....               | 12    |
| 9. Geometry around metal ion centers of complex <b>1</b> .....                            | 13    |
| 10. Geometry around metal ion centers of complex <b>1</b> .....                           | 14    |
| 11. H-bonding connectivity of complex <b>2</b> .....                                      | 14    |
| 12. TGA curves of complexes <b>1</b> and <b>2</b> .....                                   | 14    |
| 13. Detail crystallographic table for complexes <b>1</b> .....                            | 15-18 |
| 14. Detail crystallographic table for complexes <b>2</b> .....                            | 19-20 |
| 15. H-bonding interaction of complex <b>2</b> .....                                       | 20    |
| 16. Simulated and experimental mass pattern for <b>1</b> and <b>2</b> .....               | 20    |
| 17. Magnetization plots for <b>1</b> and <b>2</b> .....                                   | 21-22 |
| 18. Cytotoxicity and cancer cell growth inhibition studies of <b>1</b> and <b>2</b> ..... | 22-24 |
| 19. DNA and Protein binding studies of <b>1</b> and <b>2</b> .....                        | 24-25 |
| 20. References.....                                                                       | 26-27 |

## Experimental Section

**Materials.** Solvents and other laboratory grade reagents used in this work were either as obtained or purified according to standard literature procedure.<sup>S1</sup> *o*-vanillin (Spectrochem Pvt Ltd, Mumbai),  $\text{DyCl}_3 \cdot 6\text{H}_2\text{O}$  and  $\text{GdCl}_3 \cdot 6\text{H}_2\text{O}$  (Alfa Aesar, India), 2-amino-2-methylpropan-1-ol (Alfa Aesar, India) and triethylamine (S D Fine Chemicals, Mumbai, India) were used as received without further purification.  $\text{Cu}(\text{ClO}_4)_2 \cdot 6\text{H}_2\text{O}$  was obtained by treating an aqueous perchloric acid (1:1) with commercial  $\text{CuCO}_3$ , followed by concentration and crystallization on a water bath. Human serum albumin (fatty acid free, fraction V) was obtained from Sigma-Aldrich (USA). Calf thymus DNA (*ct*-DNA), ethidium bromide (EB) and dimethyl sulfoxide (DMSO) were purchased from Sisco Research Laboratories (Mumbai, India). Dulbecco's Modified Eagle medium (DMEM), Dulbecco's Modified Eagle Medium High glucose (DMEM-high glucose) and Dulbecco's Modified Eagle medium: Nutrient mixture F12 (DMEM/F-12), Dulbecco's phosphate buffered saline (PBS), Foetal Bovine Serum (FBS), 0.25% trypsin-EDTA and antibiotic-antimycotic solution were procured from Thermo Fisher Scientific (MA, USA). MTT (3-(4,5-dimethyl-2-thiazolyl)-2,5-diphenyl-2H-tetrazolium bromide) was obtained from HiMedia (Mumbai, India). Solutions of complexes **1** and **2** were prepared in DMSO and subsequent dilutions were made with buffers (pH 7.4) during biochemical studies.

*Caution! Metal complexes of organic ligands with perchlorate counterions are potentially explosive in nature in dry state. Therefore, the material should be prepared in very small amount, and it should be handled with extreme care.*

**Physical Measurements.** The absorption spectra were collected using a Shimadzu (Model UV2450) spectrophotometer. Elemental analysis (C, H, N) of the complex were performed with a Perkin-Elmer model 240C elemental analyser. IR measurements were recorded using KBr disks in a Perkin-Elmer FT-IR spectrometer model RX1. The purity of the bulk complex were measured by powder XRD using a BRUKER AXS X-ray diffractometer (40 kV, 20 mA) using  $\text{Cu-K}\alpha$  radiation ( $\lambda = 1.5418 \text{ \AA}$ ) within  $5\text{--}50^\circ$  ( $2\theta$ ) range and a fixed-time counting of 4 s at  $25^\circ\text{C}$ . The steady-state fluorescence spectra were recorded with a Horiba Jobin Yvon spectrofluorometer (Fluorolog-3) equipped with temperature-controlled water-cooled cuvette holder and a 1 cm path length quartz cuvette was used to take the scan of the solutions. All magnetic measurements were carried out on powdered crystalline samples restrained in eicosane using a Quantum Design SQUID magnetometer (MPMS-XL or MPMS 3). Data were

corrected for the diamagnetic contribution of the sample holder and eicosane by measurements, and for the diamagnetism of each compound. Thermogravimetric analysis (TGA) was carried out by using a PerkinElmer Pyris Diamond TG-DTA instrument.

**X-ray Crystallography.** Appropriate single crystals of **1** and **2** was chosen for data collection on a Bruker SMART APEX-II CCD X-ray diffractometer furnished with a graphite-monochromated Mo K $\alpha$  ( $\lambda = 0.71073 \text{ \AA}$ ) radiation by the  $\omega$  scan (width of  $0.3^\circ \text{ frame}^{-1}$ ) method at 293 K with a scan rate of 6 s per frame. Data processing and space group determination were done by SAINT and XPREP software's.<sup>S2</sup> The crystal structures were solved by direct method technique from SHELXS-2014<sup>S3</sup> and then refined by full-matrix least squares technique using SHELXL (2014/7)<sup>S4</sup> program packaged within WINGX version 1.80.05.<sup>S5</sup> Multiscan empirical absorption corrections were applied to the data using the program SADABS.<sup>S6</sup> The locations of the heaviest atoms i.e. Cu and Dy were determined easily and the O, N, and C atoms were subsequently determined from the difference Fourier maps. The other non-hydrogen atoms were refined with anisotropic displacement parameters. Hydrogen atoms were fixed at calculated positions, and their positions were refined by a riding model. Due to the disorders, the lattice solvent molecules of both the complexes cannot be modelled satisfactorily. So, the Olex-2 software having the mask program<sup>S7</sup> suite has been performed to discard those disordered solvent molecules and gave electron density of 75 and 207 respectively. This value allowed us to assign four and twenty H<sub>2</sub>O molecules for complexes **1** and **2** respectively. From the % weight loss of thermogravimetric analysis, we have got 2.68% loss for complex **1** and 14.17% loss for complex **2** which is equivalent to 4 H<sub>2</sub>O and 21 H<sub>2</sub>O respectively (Fig. S9). Crystallographic Figures presented in this manuscript were generated using DIAMOND software.<sup>S8</sup> The crystal data and the cell parameters for compounds **1–2** are summarized in Table S2 in the ESI. Crystallographic data (excluding structure factors) have been deposited with the Cambridge Crystallographic Data Centre as supplementary publications CCDC 2184365 and 2184368. These data can also be obtained free of cost at [www.ccdc.cam.ac.uk/conts/retrieving.html](http://www.ccdc.cam.ac.uk/conts/retrieving.html) (or from the Cambridge Crystallographic Data Centre).

#### **Synthesis of 2-[(2-hydroxy-1,1-dimethyl-ethylimino)-methyl]-6-methoxy-phenol (H<sub>2</sub>L)**

H<sub>2</sub>L was obtained from Schiff base condensation reaction between the chosen aldehyde and its amine counterpart. To a stirred solution of 2-amino-2-methylpropan-1-ol (0.18 g, 2 mmol) in MeOH (10 mL) was added 10 mL MeOH solution of 2-hydroxy-3-methoxybenzaldehyde (0.30 g, 2 mmol) in 1:1 molar ratio. After complete addition, the solution was allowed to stir for 30

min followed by a reflux of 2 h duration. Then the whole solution was evaporated under reduced pressure to reduce the solvent volume to obtain an orange oily mass. Repeated washing was made with *n*-hexane to remove the unreacted reactants and finally the substance was dried under vacuum over P<sub>4</sub>O<sub>10</sub>. The oily substance was characterized by FTIR and NMR spectroscopy, and use directly in complex formation reaction without any other purification process such as column chromatography. FT-IR (KBr) cm<sup>-1</sup>: 3360 (br), 1630 (s), 1505 (m), 1469 (w), 1366 (w), 1219 (s), 1168 (m), 1063 (m), 856 (w). <sup>1</sup>H NMR (400 MHz, CDCl<sub>3</sub>, ppm): 8.23 (1H, imine H), 6.82 (2H, ArH), 6.62 (1H, ArH), 3.82 (3H, methoxy H), 3.57 (2H, methyne H), 1.30 (6H, methyl H).

**General Procedure for Synthesizing 1–2.** A general and reproducible reaction protocol was used for the synthesis of **1** and **2** at room temperature under magnetic stirring conditions. H<sub>2</sub>L (0.22 g; 0.1 mmol) was dissolved into 10 mL of MeOH-CHCl<sub>3</sub> (2:1, v/v) solvent mixture and solid Cu(ClO<sub>4</sub>)<sub>2</sub>·6H<sub>2</sub>O (0.1 mmol, 0.31 g) was added into it followed by addition of NEt<sub>3</sub> (0.2 g, 0.2 mmol) as base giving a bright green solution. After stirring for 1 h, solid LnCl<sub>3</sub>·5H<sub>2</sub>O (0.05 mmol) (Ln = Dy<sup>3+</sup>, Gd<sup>3+</sup>) was added to the previous solution when the whole solution turned into bluish-green. The resulting solution was finally stirred for overnight at room temperature, filtered and kept for slow evaporation in air. After a week, green block-shaped single crystals suitable for X-ray diffraction analysis were obtained. The quantity of reactants involved in each case and characterization data of the products are given below.

**[Cu<sub>6</sub>Gd<sub>3</sub>(L)<sub>3</sub>(HL)<sub>3</sub>(μ<sub>3</sub>-Cl)<sub>3</sub>(μ<sub>3</sub>-OH)<sub>6</sub>(OH)<sub>2</sub>](ClO<sub>4</sub>)<sub>4</sub>·4H<sub>2</sub>O (1).** Yield: 0.022 g, 50.09 % (based on Gd<sup>3+</sup>). FT-IR (KBr) cm<sup>-1</sup>: 3493 (br), 2967 (w), 2671 (w), 1641(s), 1613 (m), 1456 (s), 1389 (m), 1297 (m), 1245 (s), 1219 (s), 1088 (s), 967 (m), 737 (m), 619 (w) Anal. Calcd. for C<sub>72</sub>H<sub>108</sub>Cl<sub>4</sub>Cu<sub>6</sub>Gd<sub>3</sub>N<sub>6</sub>O<sub>34</sub> (2596.48): C, 33.31; H, 4.19; N, 3.24. Found: C, 33.37; H, 4.17; N, 3.26.

**[Cu<sub>5</sub>Dy<sub>2</sub>(L)<sub>2</sub>(HL)<sub>2</sub>(μ-Cl)<sub>2</sub>(μ<sub>3</sub>-OH)<sub>4</sub>(ClO<sub>4</sub>)<sub>2</sub>(H<sub>2</sub>O)<sub>6</sub>](ClO<sub>4</sub>)<sub>2</sub>·2NHET<sub>3</sub>Cl·21H<sub>2</sub>O (2).** Yield: 0.028 g, 39.60 % (based on Dy<sup>3+</sup>). FT-IR (KBr) cm<sup>-1</sup>: 3497 (br), 2971 (w), 2679 (w), 1643(s), 1609 (m), 1458 (s), 1395 (m), 1295 (m), 1242 (s), 1224 (s), 1090 (s), 965 (m), 743 (m), 621 (w) Anal. Calcd. for C<sub>60</sub>H<sub>152</sub>Cl<sub>8</sub>Cu<sub>5</sub>Dy<sub>2</sub>N<sub>6</sub>O<sub>59</sub> (2828.22): C, 25.48; H, 5.42; N, 2.97. Found: C, 25.51; H, 5.41; N, 2.95.

### Cell culture

Human lung adenocarcinoma cell line (A549), human breast cancer cell line (MDA-MB-231) were obtained from National Centre for Cell Science (Pune, India) and human embryonic kidney cell line (HEK 293T) was a generous gift from Dr Arindam Mondal, School of

Bioscience, IIT Kharagpur. A549, MDA-MB-231 and HEK 293T were grown in DMEM/F12, DMEM-high glucose and DMEM media, respectively with 10% FBS and 1% antibiotic-antimycotic in a humidified atmosphere at 37°C temperature and 5% CO<sub>2</sub>.

### **Cytotoxicity assessment**

The cytotoxicity of the synthesized copper complexes was determined in cancerous (A549 and MDA-MB-231) and normal (HEK 293T) cell line using MTT assay. It is based on the reduction of the MTT reagent into insoluble formazan crystals by the mitochondrial dehydrogenases of the viable cells. The insoluble formazan crystals are then solubilised by an organic solvent such as DMSO and the purple formazan product thus formed is measured by a multi-well plate reader (1). Briefly,  $1 \times 10^4$  cells/well were seeded in a 96-well plate overnight at 37°C. Thereafter, cells were treated with different copper complexes at a range of concentrations (**1**: 5, 15, 30, 45 and 60  $\mu$ M), (**2**, SM1, SM2 and SM3: 10, 25, 50, 75 and 100  $\mu$ M) for 24 hrs. Next, the media containing the copper complexes was decanted and the cells were washed with PBS followed by incubation with 100  $\mu$ L MTT (5 mg/mL) for 3 hrs. Later, MTT solution was discarded and the insoluble formazan crystals thus formed were solubilised by adding 100  $\mu$ L of DMSO in each well. The purple formazan crystals were then measured using spectrophotometer at 590 nm.

### ***In vitro* DNA binding studies**

The experiments involving the interactions of the synthesized complexes **1** and **2** with *ct*-DNA were performed in Tris-HCl buffer (5mM Tris-HCl, 50 mM NaCl, pH 7.2) at room temperature. Purity of the used *ct*-DNA in the working buffer was evaluated from the ratio of absorbance at 260 to 280 nm, which was found to be  $>1.8$ , indicating the DNA is sufficiently free from protein. The concentration of the *ct*-DNA per nucleotide was calculated from the absorbance band at 260 nm using the molar extinction coefficient ( $\epsilon = 6600 \text{ M}^{-1} \text{ cm}^{-1}$ ).<sup>S9</sup>

### **Absorption spectroscopic studies**

Absorption titration experiments of each complex were carried out in Shimadzu 1800 spectrometer with the addition of an increasing amount of *ct*-DNA (0–50  $\mu$ M) in Tris-HCl buffer (pH 7.2) to a fixed concentration of the metal complex (23  $\mu$ M). Equal quantities of *ct*-DNA were added to the reference solution during each titration to eliminate the effect of *ct*-DNA absorption. From the absorption data, the intrinsic binding constant  $K_a$  was obtained following the Benesi-Hildebrand approach using eqn (S1).<sup>S10</sup>

$$\frac{1}{\Delta A} = \frac{1}{(\varepsilon_b - \varepsilon_f)L_T} + \frac{1}{(\varepsilon_b - \varepsilon_f)L_T K_a} \cdot \frac{1}{M} \quad (S1)$$

Here,  $\varepsilon_b$  and  $\varepsilon_f$  are the extinction coefficients (charge transfer band) of the synthesized complex in fully bound form and of the free complex, respectively, for a particular DNA concentration,  $M$ .  $L_T$  is the total complex concentration and  $\Delta A$  is the change in the absorbance at a given wavelength. By plotting the reciprocal of  $\Delta A$  versus the reciprocal of concentration of *ct*-DNA, the association constant ( $K_a$ ) can be obtained from the ratio of the intercept to the slope.

### Fluorescence Quenching

To assess the magnitude of interaction quantitatively, the quenching efficiency was evaluated using the Stern–Volmer equation

$$\frac{I_0}{I} = 1 + K_{SV} r \quad (S2)$$

Where  $I_0$  and  $I$  are the emission intensities in absence and presence of the complexes respectively,  $K_{sv}$  is the Stern–Volmer quenching constant and  $r$  is the concentration of the quencher (complex). From the linear plot of  $I_0/I$  vs.  $[\text{complex}]/[\text{DNA}]$ , the quenching constant  $K_{sv}$  can be calculated from the ratio of the slope to the intercept.

### Fluorescence binding study

Emission intensity measurements were carried out using a Horiba Jobin Yvon spectrofluorometer (Fluorolog-3) fluorescence spectrophotometer at room temperature. Luminescence titration quenching experiments were conducted by adding aliquots of *ct*-DNA (0 to 32  $\mu\text{M}$  DNA) to fixed concentration of complexes **1** and **2** (25  $\mu\text{M}$ ) in Tris-HCl buffer.

The relative binding of the ternary complexes to *ct* DNA was studied by fluorescence spectral method using ethidium bromide (EB) bound *ct* DNA solution in Tris-HCl/NaCl buffer (pH, 7.2) following a previously reported literature method. Subsequent addition of complexes **1** and **2** with increasing concentration (0–33  $\mu\text{M}$ ) quenched the fluorescence of the EB-DNA adduct. Based on fluorescence quenching, apparent binding constant ( $K_{app}$ ) was calculated from the equation (S3)

$$[\text{EB}] \times K_{EB} = [\text{complex}]_{50\%} \times K_{app}, \quad (S3)$$

Where, [EB] denotes the concentration of ethidium bromide and [complex]<sub>50%</sub> is the concentration that is required to quench the fluorescence of the EB-DNA adduct by 50% ( $K_{EB} = 1.0 \times 10^7 \text{ M}^{-1}$ , [EB] = 3.5  $\mu\text{M}$ ).

### HSA Binding Studies

In this study quenching of tryptophan fluorescence has been monitored using human serum albumin (HSA, 2  $\mu\text{M}$ ) in 10 mM phosphate buffer (pH 7.4) in Horiba Jobin Yvon spectrofluorometer (Fluorolog-3). The fluorescence emission spectra of the Trp residue of HSA were recorded at room temperature by setting the excitation wavelength at 295 nm and the scan range of 305–445 nm. Fluorometric titration experiments were carried out by using 3 mL solutions of 2  $\mu\text{M}$  HSA with successive addition of **1** and **2** from the concentration range of 0 to 8.8  $\mu\text{M}$ . Each spectrum was corrected with respect to the corresponding blank.

Determination of the fluorescence quenching process has been obtained from Stern–Volmer using eqn S4

$$\frac{F_0}{F} = 1 + K_{SV}[Q] \quad (S4)$$

Here  $F_0$  and  $F$  are the unquenched-to-quenched fluorescence intensities in the absence and presence of the *3d-4f* quencher complexes, respectively,  $[Q]$  is the concentration of the quencher and  $K_{SV}$  is the Stern–Volmer constant.  $K_{SV}$  is related to both the fluorescence lifetime of the fluorophore and the rate constant for the quenching process (eqn S5).

$$K_{SV} = k_q \tau_0 \quad (S5)$$

Here  $\tau_0$  is the lifetime of the unquenched fluorophore (5 ns) and  $k_q$  is the bimolecular quenching constant.<sup>S11</sup> The quenching constant, also known as the binding constant  $K_a$ , and the number of binding sites ( $n$ ) between the albumin protein and metal ion complexes were calculated using the Scatchard equation S6.<sup>S12</sup>

$$\log \frac{F_0 - F}{F} = \log K_a + n \log [Q] \quad (S6)$$

The binding constant ( $K_a$ ) for the formation of adducts between the *3d-4f* complexes or {*3d-4f*} fragments and HSA was determined using the double logarithmic plots (Fig. S16 c and f). The values of  $K_{SV}$  and  $n$  for complexes **1** and **2** are summarized in Table 4 in manuscript.



**Table S1.** Representative Examples of Cu<sup>II</sup>/Gd<sup>III</sup> Complexes having Magnetocaloric properties

| Compounds <sup>[a]</sup>                                                                                                                                                                                                     | Experimental<br>$\Delta S_m(\text{J}\cdot\text{kg}^{-1}\cdot\text{K}^{-1})$ | Theoretical<br>$\Delta S_m(\text{J}\cdot\text{kg}^{-1}\cdot\text{K}^{-1})$ | Ref. |
|------------------------------------------------------------------------------------------------------------------------------------------------------------------------------------------------------------------------------|-----------------------------------------------------------------------------|----------------------------------------------------------------------------|------|
| [Gd <sub>2</sub> Cu <sub>6</sub> (Gly) <sub>6</sub> (FA) <sub>3</sub> ( $\mu_3$ -OH) <sub>3</sub> ( $\mu_3$ -OH <sub>2</sub> ) <sub>3</sub> (H <sub>2</sub> O) <sub>9</sub> ](ClO <sub>4</sub> ) <sub>6</sub>                | 6.0                                                                         | 28.7                                                                       | S13  |
| [Gd <sub>2</sub> Cu <sub>6</sub> (Gly) <sub>6</sub> (FA) <sub>3</sub> ( $\mu_3$ -OH) <sub>3</sub> ( $\mu_3$ -OH <sub>2</sub> ) <sub>3</sub> (H <sub>2</sub> O) <sub>8</sub> ]                                                | 5.8                                                                         | 30.1                                                                       | S13  |
| [Gd <sub>4</sub> Cu <sub>8</sub> (OH) <sub>8</sub> (Me <sub>3</sub> CCOO) <sub>8</sub> (hmp) <sub>8</sub> ](NO <sub>3</sub> ) <sub>2</sub> (OH) <sub>2</sub>                                                                 | 13.5                                                                        | 32.6                                                                       | S14  |
| [{Cu <sub>5</sub> Gd <sub>2</sub> (L <sup>1</sup> ) <sub>2</sub> ( $\mu_3$ -OH) <sub>4</sub> (NO <sub>3</sub> ) <sub>4</sub> ( $\mu$ -OH <sub>2</sub> ) <sub>2</sub> }(NO <sub>3</sub> ) <sub>2</sub> ] <sub>n</sub>         | 15.7                                                                        | 34.37                                                                      | S15  |
| [Gd <sub>2</sub> Cu <sub>6</sub> (ipo) <sub>6</sub> (H <sub>2</sub> O) <sub>12</sub> ]                                                                                                                                       | 13.97                                                                       | 34.8                                                                       | S16  |
| [{Gd(hfac) <sub>3</sub> } <sub>3</sub> {Cu(hfac)}{NIT-Ph(OMe) <sub>2</sub> } <sub>4</sub> ] <sub>n</sub>                                                                                                                     | 13.5                                                                        | 20.24                                                                      | S17  |
| [Cu <sub>6</sub> Gd <sub>2</sub> (L <sup>2</sup> ) <sub>6</sub> (L <sup>2</sup> H) <sub>6</sub> (MeOH) <sub>6</sub> ] <sub>n</sub>                                                                                           | 11.8                                                                        | 22.62                                                                      | S18  |
| [Cu <sub>5</sub> Gd <sub>4</sub> O <sub>2</sub> (OMe) <sub>4</sub> (teaH) <sub>4</sub> (O <sub>2</sub> CC(CH <sub>3</sub> ) <sub>2</sub> )(NO <sub>3</sub> ) <sub>4</sub> ]                                                  | 31                                                                          | 34.93                                                                      | S19  |
| [Cu <sub>4</sub> Gd <sub>12</sub> (OH) <sub>20</sub> (teaH) <sub>2</sub> (teaH <sub>2</sub> ) <sub>4</sub> (O <sub>2</sub> CPh-2-Ph) <sub>8</sub> (H <sub>2</sub> O) <sub>6</sub> Cl <sub>2</sub> ](Cl) <sub>6</sub>         | 33.0                                                                        | 42.1                                                                       | S20  |
| Na[Cu <sub>24</sub> Gd <sub>6</sub> (L-Ala) <sub>12</sub> (Ac) <sub>6</sub> ( $\mu_3$ -OH) <sub>30</sub> (NO <sub>3</sub> ) <sub>4</sub> (H <sub>2</sub> O) <sub>20</sub> ](NO <sub>3</sub> ) <sub>8</sub> (OH) <sub>7</sub> | 21.2                                                                        | 39.1                                                                       | S21  |
| [Gd <sub>4</sub> Cu <sub>8</sub> (OH) <sub>8</sub> (hmp) <sub>8</sub> (O <sub>2</sub> CCHMe <sub>2</sub> ) <sub>8</sub> ](ClO <sub>4</sub> ) <sub>4</sub>                                                                    | 14.6                                                                        | 23.02                                                                      | S22  |
| [Cu <sub>4</sub> Gd <sub>2</sub> (OH) <sub>2</sub> (NO <sub>3</sub> ) <sub>8</sub> {(py) <sub>2</sub> CO <sub>2</sub> } <sub>2</sub> (MeCN) <sub>4</sub> ]                                                                   | 22.9                                                                        | 34.9                                                                       | S23  |
| [{(Cu(salen)) <sub>2</sub> Gd(NO <sub>3</sub> ) <sub>3</sub> ]                                                                                                                                                               | 17                                                                          | 24.4                                                                       | S24  |

<sup>[a]</sup>FA: Formic acid; Gly: Glycine; L<sup>1</sup>H<sub>3</sub>: N,N'-bis-(3-methoxysalicylidene)-1,3-diamino-2-propanol; ipoH<sub>3</sub>: 2-hydroxy-isophthalic acid; NIT-Ph(OMe)<sub>2</sub>: 2-(2,4-dimethoxyphenyl)-4,4,5,5-tetramethyl-imidazolyl-1-oxyl-3-oxide; hfac: hexafluoroacetyl acetone; L<sup>2</sup>H<sub>2</sub>: acenaphthenequinone dioxime; teaH<sub>3</sub>: triethanolamine; Hhmp: 2-pyridinylmethanol.

**Table S2** Crystal data and refinement parameter of **1** and **2**

| parameters                         | <b>1</b>                                                                                                        | <b>2</b>                                                                                                        |
|------------------------------------|-----------------------------------------------------------------------------------------------------------------|-----------------------------------------------------------------------------------------------------------------|
| Formula                            | C <sub>72</sub> H <sub>108</sub> Cl <sub>4</sub> Cu <sub>6</sub> Gd <sub>3</sub> N <sub>6</sub> O <sub>34</sub> | C <sub>60</sub> H <sub>152</sub> Cl <sub>8</sub> Cu <sub>5</sub> Dy <sub>2</sub> N <sub>6</sub> O <sub>59</sub> |
| F.W.(g mol <sup>-1</sup> )         | 2596.48                                                                                                         | 2828.17                                                                                                         |
| crystal system                     | monoclinic                                                                                                      | triclinic                                                                                                       |
| space group                        | P 21/c                                                                                                          | P -1                                                                                                            |
| Crystal color                      | Green                                                                                                           | Green                                                                                                           |
| Crystal size/mm <sup>3</sup>       | 0.2×0.1×0.01                                                                                                    | 0.28×0.13×0.11                                                                                                  |
| limiting indices                   | -26 ≤ h ≤ 26<br>-48 ≤ k ≤ 48<br>-26 ≤ l ≤ 32                                                                    | -18 ≤ h ≤ 17<br>-18 ≤ k ≤ 18<br>-19 ≤ l ≤ 16                                                                    |
| a/ Å                               | 21.5095(5)                                                                                                      | 14.468(15)                                                                                                      |
| b/ Å                               | 39.1997(8)                                                                                                      | 15.061(13)                                                                                                      |
| c/ Å                               | 26.0609(4)                                                                                                      | 15.723(14)                                                                                                      |
| α/ deg                             | 90                                                                                                              | 87.63(9)                                                                                                        |
| β/ deg                             | 96.3670(16)                                                                                                     | 68.21(7)                                                                                                        |
| γ/ deg                             | 90                                                                                                              | 69.24(7)                                                                                                        |
| V/ Å <sup>3</sup>                  | 21838.1(7)                                                                                                      | 2959(5)                                                                                                         |
| D <sub>c</sub> /g cm <sup>-3</sup> | 1.536                                                                                                           | 1.587                                                                                                           |

|                                                 |                |                |
|-------------------------------------------------|----------------|----------------|
| $\mu$ (mm <sup>-1</sup> )                       | 3.102          | 2.398          |
| F(000)                                          | 9984           | 1239           |
| $\theta$ for data collection (deg)              | 1.562 – 26.372 | 2.858 – 26.420 |
| $T/K$                                           | 150            | 299(2)         |
| Total reflns                                    | 199345         | 34495          |
| R(int)                                          | 0.1116         | 0.0649         |
| Unique reflns                                   | 44429          | 11918          |
| Observed reflns                                 | 24988          | 8261           |
| Parameters                                      | 2267           | 526            |
| $R_1; wR_2$ ( $I > 2\sigma(I)$ )                | 0.0793, 0.2254 | 0.0467, 0.1178 |
| GOF ( $F^2$ )                                   | 1.052          | 1.086          |
| Largest diff peak and hole (e Å <sup>-3</sup> ) | 1.899, -1.265  | 0.863, -0.935  |
| CCDC No.                                        | 2184365        | 2184368        |

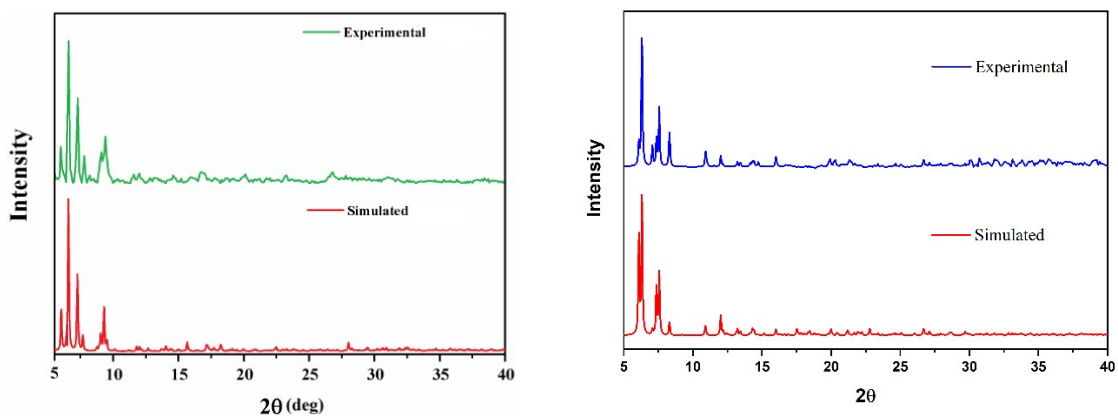

**Fig. S1** Powder XRD pattern of Cu<sub>6</sub>Gd<sub>3</sub> (**1**) and Cu<sub>5</sub>Dy<sub>2</sub> (**2**) complexes

**Chart S1.** Ligand with available pockets and observed coordination mode of H<sub>2</sub>L<sup>S25</sup>

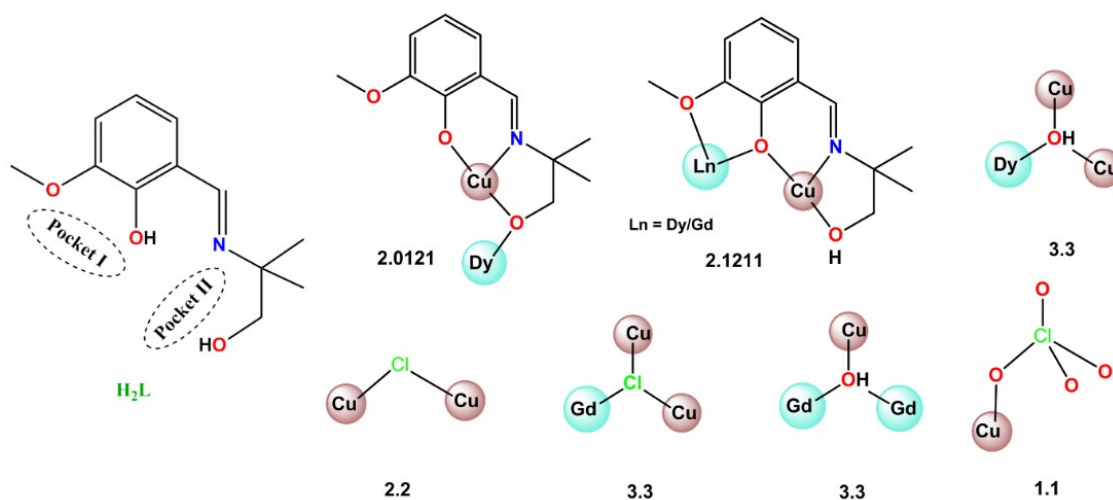

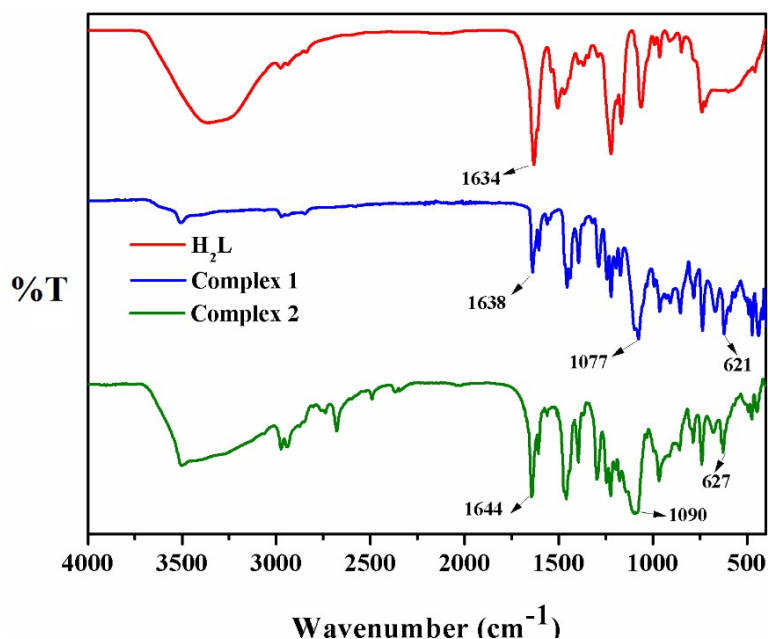

**Fig. S2** FTIR spectra of  $H_2L$ , complex **1** and complex **2**

**Table S3** Results of continuous shape measures calculations<sup>S26–S27</sup> using program SHAPE 2.1 for Cu<sup>II</sup> atoms of **1** and **2**.<sup>a</sup>

| [ML5]           | PP-5   | vOC-5 | TBPY-5 | SPY-5        | JTBPY-5 |
|-----------------|--------|-------|--------|--------------|---------|
| Cu1 of <b>1</b> | 30.075 | 3.577 | 5.725  | <b>1.933</b> | 9.957   |
| Cu1 of <b>2</b> | 28.796 | 2.788 | 6.761  | <b>2.331</b> | 10.345  |
| Cu2 of <b>2</b> | 30.698 | 3.529 | 4.688  | <b>1.657</b> | 8.855   |

<sup>a</sup>PP-5 = Pentagon, vOC-5 = Vacant octahedron, TBPY-5 = Trigonal bipyramid, SPY-5 = Spherical square pyramid, JTBPY-5 = Johnson trigonal bipyramid J12

**Table S4** Results of continuous shape measures calculations<sup>S26–S27</sup> using program SHAPE 2.1 for Cu3 atoms of **2**.<sup>a</sup>

|                 | JPPY-6 | TPR-6  | OC-6         | PPY-6  | HP-6   |
|-----------------|--------|--------|--------------|--------|--------|
| Cu3 of <b>2</b> | 31.098 | 17.203 | <b>2.503</b> | 28.836 | 30.935 |

<sup>a</sup>JPPY-6 = Johnson pentagonal pyramid J2, TPR-6 = Trigonal prism, OC-6 = Octahedron, PPY-6 = Pentagonal pyramid, HP-6 = Hexagon

**Table S5** Results of continuous shape measures calculations<sup>S26–S27</sup> using program SHAPE 2.1 for Gd1 atoms of **1**.<sup>a</sup>

| [ML10]          | DP-10  | EPY-10 | OBPY-10 | PPR-10 | PAPR-10 | JBCCU-10 | JBCSAPR-10 | JMBIC-10 | JATDI-10 | JSPC-10      | SDD-10 | TD-10 | HD-10  |
|-----------------|--------|--------|---------|--------|---------|----------|------------|----------|----------|--------------|--------|-------|--------|
| Gd1 of <b>1</b> | 36.438 | 24.642 | 17.071  | 10.108 | 14.676  | 13.468   | 5.245      | 10.395   | 19.638   | <b>1.837</b> | 6.833  | 6.156 | 11.440 |

|                 |        |        |        |        |        |        |       |       |        |              |       |       |        |
|-----------------|--------|--------|--------|--------|--------|--------|-------|-------|--------|--------------|-------|-------|--------|
| Gd3 of <b>1</b> | 36.494 | 24.806 | 16.994 | 10.275 | 14.607 | 13.297 | 4.804 | 9.940 | 19.580 | <b>1.789</b> | 6.630 | 5.896 | 11.303 |
|-----------------|--------|--------|--------|--------|--------|--------|-------|-------|--------|--------------|-------|-------|--------|

<sup>a</sup>*DP-10 = Decagon, EPY-10 = Enneagonal pyramid, OBPY-10 = Octagonal bipyramid, PPR-10 = Pentagonal prism, PAPR-10 = Pentagonal antiprism, JBCCU-10 = Bicapped cube J15, JBCSAPR-10 = Bicapped square antiprism J17, JMBIC-10 = Metabidiminished icosahedron J62, JATDI-10 = Augmented tridiminished icosahedron J64, JSPC-10 = Sphenocorona J87, SDD-10 = Staggered Dodecahedron, TD-10 = Tetradecehedron, HD-10 = Hexadecahedron*

**Table S6** Results of continuous shape measures calculations<sup>S26–S27</sup> using program SHAPE 2.1 for Gd2 atoms of **1**.<sup>a</sup>

| [ML9]           | EP-9   | OPY-9  | HBPY-9 | JTC-9  | JCCU-9 | CCU-9  | JCSAPR-9 | CSAPR-9 | <b>JTCTPR-9</b> | TCTPR-9 | JTDIC-9 | HH-9   | MFF-9 |
|-----------------|--------|--------|--------|--------|--------|--------|----------|---------|-----------------|---------|---------|--------|-------|
| Gd2 of <b>1</b> | 38.062 | 21.716 | 22.295 | 16.410 | 10.665 | 10.873 | 1.964    | 2.313   | <b>0.935</b>    | 1.431   | 11.225  | 14.793 | 3.161 |

<sup>a</sup>*EP-9 = Enneagon, OPY-9 = Octagonal pyramid, HBPY-9 = Heptagonal bipyramid, JTC-9 = Johnson triangular cupola J3, JCCU-9 = Capped cube J8, CCU-9 = Spherical-relaxed capped cube, JCSAPR-9 = Capped square antiprism J10, CSAPR-9 = Spherical capped square antiprism, JTCTPR-9 = Tricapped trigonal prism J51, TCTPR-9 = Spherical tricapped trigonal prism, JTDIC-9 = Tridiminished icosahedron J63, HH-9 = Hula-hoop, MFF-9 = Muffin*

**Table S7** Results of continuous shape measures calculations<sup>S26–S27</sup> using program SHAPE 2.1 for Dy1 atoms of **1**.<sup>a</sup>

| [ML8]           | OP-8   | HPY-8  | HBPY-8 | CU-8   | SAPR-8 | <b>TDD-8</b> | JGBF-8 | JETBPY-8 | JBTPR-8 | BTPR-8 | JSD-8 | TT-8   |
|-----------------|--------|--------|--------|--------|--------|--------------|--------|----------|---------|--------|-------|--------|
| Dy1 of <b>2</b> | 33.578 | 20.476 | 14.352 | 11.331 | 4.388  | <b>2.569</b> | 11.725 | 24.915   | 2.575   | 2.406  | 4.765 | 11.866 |

<sup>a</sup>*OP-8 = Octagon, HPY-8 = Heptagonal pyramid, HBPY-8 = Hexagonal bipyramid, CU-8 = Cube, SAPR-8 = square antiprism, TDD-8 = Triangular dodecahedron, JGBF-8 = Johnson gyrobifastigium J26, JETBPY-8 = Johnson elongated triangular bipyramid J14, JBTPR-8 = Biaugmented trigonal prism J50, BTPR-8 = Biaugmented trigonal prism, JSD-8 = Snub diphenoid J84, TT-8 = Triakis tetrahedron*

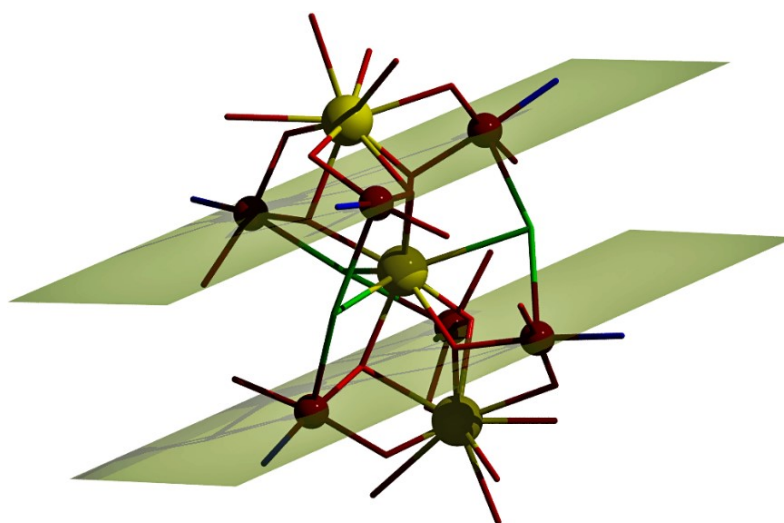

**Fig. S3** Two Cu<sub>3</sub> unit containing parallel planes present in complex **1**

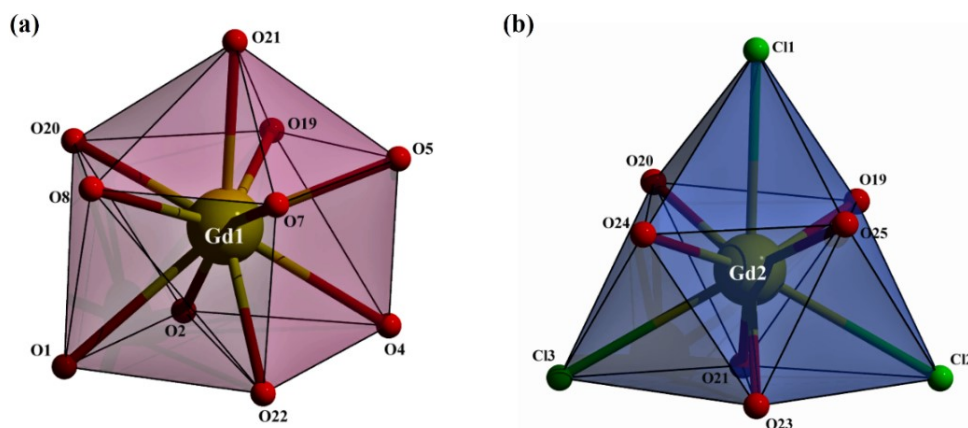

**Fig. S4** (a) Distorted sphenocorona geometry around Gd1; (b) distorted tricapped trigonal prismatic geometry around Gd2.

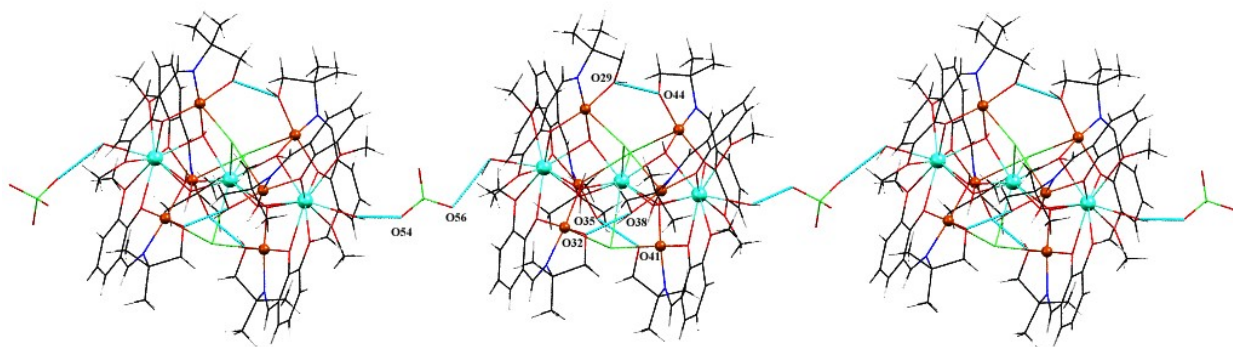

**Fig. S5** 1D-chain like H-bonding present in complex **1** through perchlorate anion.

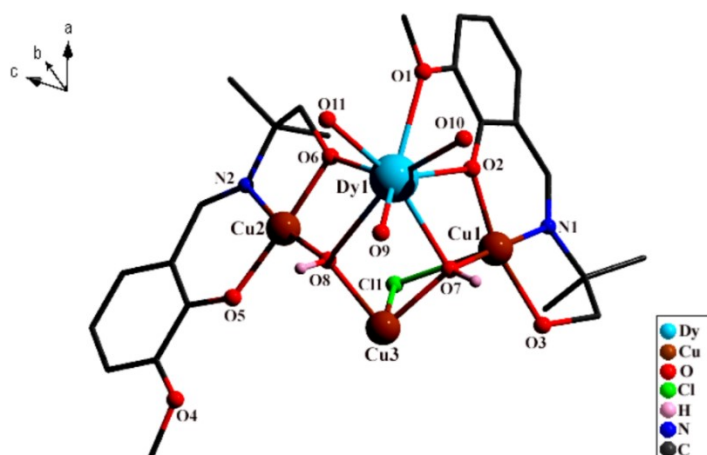

**Fig. S6** Asymmetric unit of **2** with partial atom numbering. Counter anion and solvent molecules are omitted for clarity.

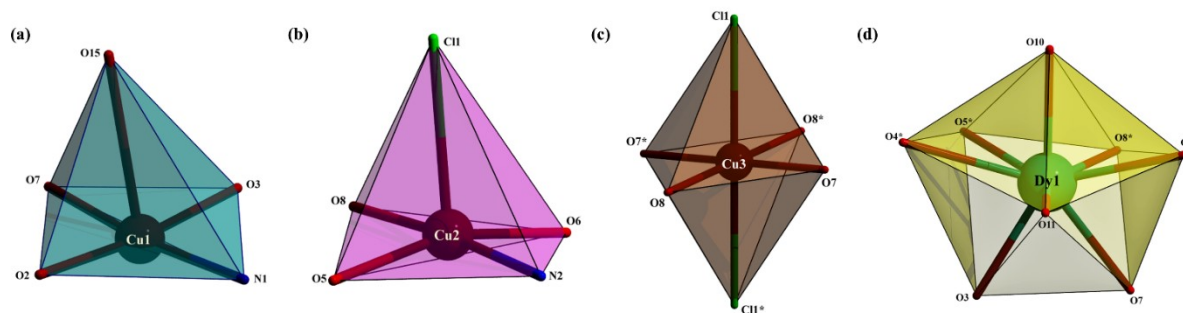

**Fig. S7** Coordination environments around metal ion centers (a) Cu1: distorted square pyramidal; (b) Cu2: distorted square pyramidal (c) Cu3: distorted octahedral and (d) Dy1: distorted biaugmented trigonal prism geometry.

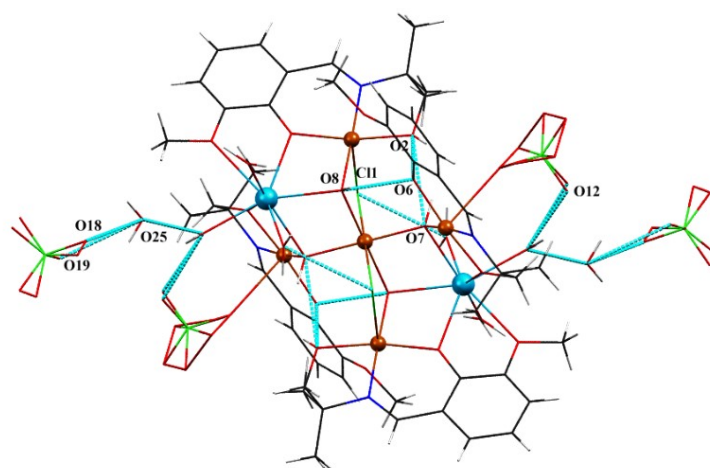

**Fig. S8** Weak intra-molecular hydrogen bonding present in complex **2**. Solvent molecules are omitted for clarity.

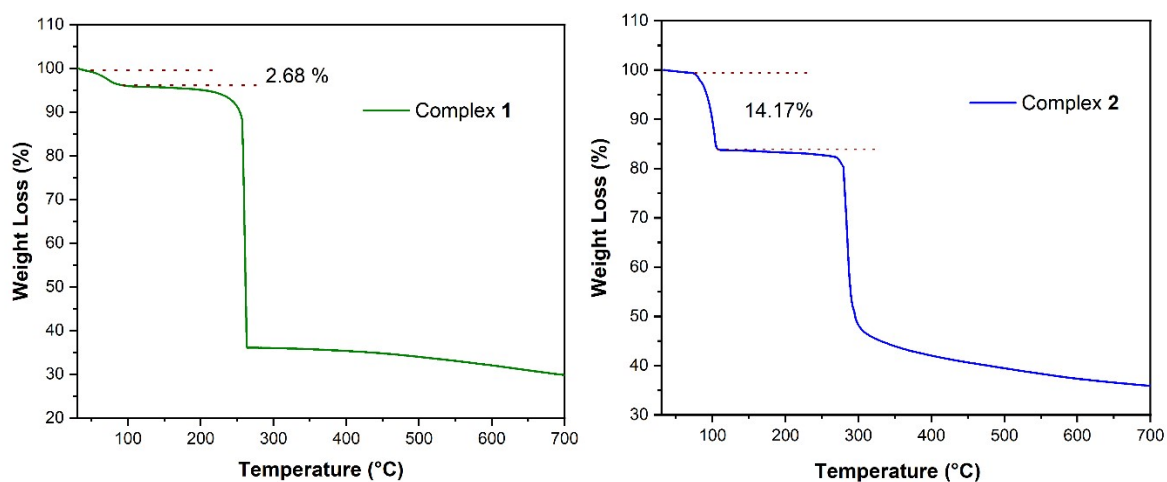

**Fig. S9** TGA curves of complexes **1** and **2**. The % of weight loss in the temperature range 70–110 °C is: **1**; 2.68 and **2**; 14.17.

**Table S8** Selected bond distances of **1**

| Atom 1 | Atom 2 | Distance [Å] | Atom 1 | Atom 2 | Distance [Å] |
|--------|--------|--------------|--------|--------|--------------|
| Gd1    | O1     | 2.764(7)     | Gd3    | O25    | 2.447(7)     |
| Gd1    | O2     | 2.431(7)     | Gd3    | O26    | 2.450(8)     |
| Gd1    | O4     | 2.705(7)     | Cu1    | O2     | 1.959(7)     |
| Gd1    | O5     | 2.424(7)     | Cu1    | O3     | 1.926(7)     |
| Gd1    | O7     | 2.689(7)     | Cu1    | O19    | 1.918(7)     |
| Gd1    | O8     | 2.400(7)     | Cu1    | N1     | 1.941(9)     |
| Gd1    | O19    | 2.422(7)     | Cu2    | O5     | 1.961(7)     |
| Gd1    | O20    | 2.426(7)     | Cu2    | O6     | 1.923(7)     |
| Gd1    | O21    | 2.435(6)     | Cu2    | O21    | 1.925(7)     |
| Gd1    | O22    | 2.457(7)     | Cu2    | N2     | 1.955(8)     |
| Gd2    | Cl1    | 3.023(3)     | Cu3    | O8     | 1.926(7)     |
| Gd2    | Cl2    | 2.997(2)     | Cu3    | O9     | 1.950(7)     |
| Gd2    | Cl3    | 3.000(2)     | Cu3    | O20    | 1.923(7)     |
| Gd2    | O19    | 2.384(7)     | Cu3    | N3     | 1.933(9)     |
| Gd2    | O20    | 2.393(7)     | Cu4    | O11    | 1.942(7)     |
| Gd2    | O21    | 2.379(6)     | Cu4    | O12    | 1.936(7)     |
| Gd2    | O23    | 2.385(7)     | Cu4    | O23    | 1.936(6)     |
| Gd2    | O24    | 2.364(7)     | Cu4    | N4     | 1.923(9)     |
| Gd2    | O25    | 2.405(6)     | Cu5    | O14    | 1.940(7)     |
| Gd3    | O10    | 2.778(8)     | Cu5    | O15    | 1.922(7)     |
| Gd3    | O11    | 2.406(7)     | Cu5    | O24    | 1.923(6)     |
| Gd3    | O13    | 2.705(7)     | Cu5    | N5     | 1.913(9)     |
| Gd3    | O14    | 2.429(7)     | Cu6    | O17    | 1.938(7)     |
| Gd3    | O16    | 2.713(7)     | Cu6    | O18    | 1.935(7)     |
| Gd3    | O17    | 2.415(7)     | Cu6    | O25    | 1.912(6)     |
| Gd3    | O23    | 2.417(7)     | Cu6    | N6     | 1.926(8)     |
| Gd3    | O24    | 2.448(6)     |        |        |              |

**Table S9** Selected bond angles of **1**

| Atom 1 | Atom 2 | Atom 3 | Bond<br>Angles(°) | Atom<br>1 | Atom 2 | Atom<br>3 | Bond<br>Angles(°) |
|--------|--------|--------|-------------------|-----------|--------|-----------|-------------------|
| O2     | Gd1    | O1     | 59.6(2)           | O19       | Gd1    | O20       | 70.2(2)           |
| O2     | Gd1    | O4     | 67.1(2)           | O19       | Gd1    | O21       | 69.0(2)           |
| O2     | Gd1    | O7     | 159.3(2)          | O19       | Gd1    | O22       | 139.0(2)          |
| O2     | Gd1    | O21    | 128.1(2)          | O20       | Gd1    | O1        | 70.8(2)           |
| O2     | Gd1    | O22    | 91.2(2)           | O20       | Gd1    | O2        | 72.7(2)           |
| O4     | Gd1    | O1     | 104.9(2)          | O20       | Gd1    | O4        | 134.3(2)          |
| O5     | Gd1    | O1     | 159.9(2)          | O20       | Gd1    | O7        | 120.8(2)          |
| O5     | Gd1    | O2     | 118.0(2)          | O20       | Gd1    | O21       | 70.5(2)           |
| O5     | Gd1    | O4     | 59.7(2)           | O20       | Gd1    | O22       | 136.3(2)          |
| O5     | Gd1    | O7     | 67.6(2)           | O21       | Gd1    | O1        | 133.8(2)          |
| O5     | Gd1    | O20    | 128.9(2)          | O21       | Gd1    | O4        | 120.1(2)          |
| O5     | Gd1    | O21    | 64.9(2)           | O21       | Gd1    | O7        | 72.7(2)           |
| O5     | Gd1    | O22    | 94.7(2)           | O21       | Gd1    | O22       | 140.4(2)          |
| O7     | Gd1    | O1     | 107.7(2)          | O22       | Gd1    | O1        | 66.1(2)           |
| O7     | Gd1    | O4     | 104.1(2)          | O22       | Gd1    | O4        | 66.3(2)           |
| O8     | Gd1    | O1     | 67.9(2)           | O22       | Gd1    | O7        | 68.1(3)           |
| O8     | Gd1    | O2     | 120.3(2)          | Cl2       | Gd2    | Cl1       | 118.24(7)         |
| O8     | Gd1    | O4     | 158.0(2)          | Cl2       | Gd2    | Cl3       | 120.22(7)         |
| O8     | Gd1    | O5     | 121.0(2)          | Cl3       | Gd2    | Cl1       | 121.54(7)         |
| O8     | Gd1    | O7     | 61.3(2)           | O19       | Gd2    | Cl1       | 72.48(18)         |
| O8     | Gd1    | O19    | 128.3(2)          | O19       | Gd2    | Cl2       | 67.57(17)         |
| O8     | Gd1    | O20    | 64.6(2)           | O19       | Gd2    | Cl2       | 131.55(17)        |
| O8     | Gd1    | O21    | 73.3(2)           | O19       | Gd2    | O20       | 71.4(2)           |
| O8     | Gd1    | O22    | 92.2(2)           | O19       | Gd2    | O23       | 135.4(2)          |
| O19    | Gd1    | O1     | 118.8(2)          | O19       | Gd2    | O25       | 96.8(2)           |
| O19    | Gd1    | O2     | 64.8(2)           | O20       | Gd2    | Cl1       | 67.79(17)         |
| O19    | Gd1    | O4     | 73.6(2)           | O20       | Gd2    | Cl2       | 132.93(18)        |
| O19    | Gd1    | O5     | 71.5(2)           | O20       | Gd2    | Cl3       | 73.19(18)         |
| O19    | Gd1    | O7     | 132.6(2)          | O20       | Gd2    | O25       | 134.9(2)          |



|     |     |     |            |  |     |     |     |          |
|-----|-----|-----|------------|--|-----|-----|-----|----------|
| O21 | Gd2 | Cl1 | 131.95(16) |  | O11 | Gd3 | O25 | 129.3(2) |
| O21 | Gd2 | Cl2 | 73.34(17)  |  | O11 | Gd3 | O26 | 91.0(3)  |
| O21 | Gd2 | Cl3 | 67.71(17)  |  | O13 | Gd3 | O10 | 107.5(2) |
| O21 | Gd2 | O19 | 70.6(2)    |  | O13 | Gd3 | O16 | 102.6(2) |
| O21 | Gd2 | O20 | 72.0(2)    |  | O14 | Gd3 | O10 | 67.9(2)  |
| O21 | Gd2 | O23 | 95.6(2)    |  | O14 | Gd3 | O13 | 60.6(2)  |
| O21 | Gd2 | O25 | 146.3(2)   |  | O14 | Gd3 | O16 | 158.2(2) |
| O23 | Gd2 | Cl1 | 132.46(17) |  | O14 | Gd3 | O24 | 65.2(2)  |
| O23 | Gd2 | Cl2 | 67.85(17)  |  | O14 | Gd3 | O25 | 71.4(2)  |
| O23 | Gd2 | Cl3 | 72.76(17)  |  | O14 | Gd3 | O26 | 90.9(3)  |
| O23 | Gd2 | O20 | 145.9(2)   |  | O16 | Gd3 | O10 | 108.5(2) |
| O23 | Gd2 | O25 | 71.3(2)    |  | O17 | Gd3 | O10 | 163.7(2) |
| O24 | Gd2 | Cl1 | 72.77(16)  |  | O17 | Gd3 | O13 | 66.6(2)  |
| O24 | Gd2 | Cl2 | 133.19(16) |  | O17 | Gd3 | O14 | 117.6(2) |
| O24 | Gd2 | Cl3 | 68.25(16)  |  | O17 | Gd3 | O16 | 60.3(2)  |
| O24 | Gd2 | O19 | 145.2(2)   |  | O17 | Gd3 | O23 | 71.2(2)  |
| O24 | Gd2 | O20 | 93.9(2)    |  | O17 | Gd3 | O24 | 126.6(2) |
| O24 | Gd2 | O21 | 135.9(2)   |  | O17 | Gd3 | O25 | 63.6(2)  |
| O24 | Gd2 | O25 | 71.0(2)    |  | O23 | Gd3 | O10 | 118.5(2) |
| O25 | Gd2 | Cl1 | 67.14(16)  |  | O23 | Gd3 | O13 | 133.1(2) |
| O25 | Gd2 | Cl2 | 73.00(16)  |  | O23 | Gd3 | O14 | 129.2(2) |
| O25 | Gd2 | Cl3 | 131.68(17) |  | O23 | Gd3 | O16 | 72.1(2)  |
| O11 | Gd3 | O10 | 59.7(2)    |  | O23 | Gd3 | O24 | 70.9(2)  |
| O11 | Gd3 | O13 | 157.1(2)   |  | O23 | Gd3 | O25 | 70.0(2)  |
| O11 | Gd3 | O14 | 122.0(2)   |  | O23 | Gd3 | O26 | 139.6(3) |
| O11 | Gd3 | O16 | 67.8(2)    |  | O24 | Gd3 | O10 | 69.6(2)  |
| O11 | Gd3 | O17 | 119.8(2)   |  | O24 | Gd3 | O13 | 121.1(2) |
| O11 | Gd3 | O23 | 65.5(2)    |  | O24 | Gd3 | O16 | 135.2(2) |
| O11 | Gd3 | O24 | 74.4(2)    |  | O24 | Gd3 | O26 | 136.3(3) |
| O25 | Gd3 | O10 | 130.8(2)   |  | N4  | Cu4 | O12 | 86.1(4)  |
| O25 | Gd3 | O13 | 73.6(2)    |  | N4  | Cu4 | O23 | 175.5(4) |
| O25 | Gd3 | O16 | 119.4(2)   |  | O15 | Cu5 | O14 | 169.6(3) |

|     |     |     |          |  |     |     |     |          |
|-----|-----|-----|----------|--|-----|-----|-----|----------|
| O25 | Gd3 | O24 | 69.0(2)  |  | O15 | Cu5 | O24 | 97.0(3)  |
| O25 | Gd3 | O26 | 139.6(3) |  | O24 | Cu5 | O14 | 85.7(3)  |
| O26 | Gd3 | O10 | 67.6(3)  |  | N5  | Cu5 | O14 | 91.6(3)  |
| O26 | Gd3 | O13 | 66.1(3)  |  | N5  | Cu5 | O15 | 85.3(4)  |
| O26 | Gd3 | O16 | 68.6(3)  |  | N5  | Cu5 | O24 | 176.9(4) |
| O3  | Cu1 | O2  | 169.5(3) |  | O18 | Cu6 | O17 | 169.4(3) |
| O3  | Cu1 | N1  | 85.6(3)  |  | O25 | Cu6 | O17 | 83.5(3)  |
| O19 | Cu1 | O2  | 84.2(3)  |  | O25 | Cu6 | O18 | 97.4(3)  |
| O19 | Cu1 | O3  | 97.0(3)  |  | O25 | Cu6 | N6  | 175.5(3) |
| O19 | Cu1 | N1  | 175.3(3) |  | N6  | Cu6 | O17 | 92.8(3)  |
| N1  | Cu1 | O2  | 92.5(3)  |  | N6  | Cu6 | O18 | 85.8(3)  |
| O6  | Cu2 | O5  | 171.2(3) |  | Cu1 | O2  | Gd1 | 104.0(3) |
| O6  | Cu2 | O21 | 97.8(3)  |  | Cu3 | O8  | Gd1 | 105.7(3) |
| O6  | Cu2 | N2  | 85.1(3)  |  | Cu4 | O11 | Gd3 | 104.3(3) |
| O21 | Cu2 | O5  | 84.3(3)  |  | Cu5 | O14 | Gd3 | 103.9(3) |
| O21 | Cu2 | N2  | 174.8(3) |  | Cu6 | O17 | Gd3 | 106.0(3) |
| N2  | Cu2 | O5  | 92.3(3)  |  | Gd2 | O19 | Gd1 | 96.4(2)  |
| O8  | Cu3 | O9  | 169.4(3) |  | Cu1 | O19 | Gd1 | 105.6(3) |
| O8  | Cu3 | N3  | 93.4(4)  |  | Cu1 | O19 | Gd2 | 122.2(3) |
| O20 | Cu3 | O8  | 84.1(3)  |  | Gd2 | O20 | Gd1 | 96.1(2)  |
| O20 | Cu3 | O9  | 98.1(3)  |  | Cu3 | O20 | Gd1 | 104.8(3) |
| O20 | Cu3 | N3  | 175.7(4) |  | Cu3 | O20 | Gd2 | 120.2(3) |
| N3  | Cu3 | O9  | 83.6(4)  |  | Gd2 | O21 | Gd1 | 96.2(2)  |
| O12 | Cu4 | O11 | 169.2(3) |  | Cu2 | O21 | Gd1 | 105.2(3) |
| O23 | Cu4 | O11 | 84.5(3)  |  | Cu2 | O21 | Gd2 | 121.9(3) |
| O23 | Cu4 | O12 | 96.3(3)  |  | Gd2 | O23 | Gd3 | 96.5(2)  |
| N4  | Cu4 | O11 | 92.3(4)  |  | Cu4 | O23 | Gd2 | 122.7(3) |
| Cu4 | O23 | Gd3 | 104.0(3) |  | Cu5 | O24 | Gd3 | 103.8(3) |
| Gd2 | O24 | Gd3 | 96.2(2)  |  | Gd2 | O25 | Gd3 | 95.2(2)  |
| Cu5 | O24 | Gd2 | 123.1(3) |  |     |     |     |          |

**Table S10** Selected bond distances of **2**

| Atom 1 | Atom 2 | Distance [Å] | Atom 1 | Atom 2 | Distance [Å] |
|--------|--------|--------------|--------|--------|--------------|
| Dy1    | O7     | 2.381(3)     | Cu3    | Cl1    | 2.684(3)     |
| Dy1    | O8     | 2.407(5)     | Cu3    | Cl1    | 2.684(3)     |
| Dy1    | O5     | 2.316(4)     | Cu2    | O8     | 1.951(4)     |
| Dy1    | O3     | 2.219(4)     | Cu2    | O5     | 1.919(4)     |
| Dy1    | O4     | 2.578(4)     | Cu2    | O6     | 1.987(4)     |
| Dy1    | O9     | 2.427(4)     | Cu2    | N2     | 1.931(5)     |
| Dy1    | O10    | 2.366(4)     | Cu2    | Cl1    | 2.695(3)     |
| Dy1    | O11    | 2.334(5)     | Cu1    | O7     | 1.973(4)     |
| Cu3    | O7     | 1.969(4)     | Cu1    | O2     | 1.919(3)     |
| Cu3    | O7     | 1.969(4)     | Cu1    | O3     | 1.935(4)     |
| Cu3    | O8     | 2.005(3)     | Cu1    | N1     | 1.920(4)     |
| Cu3    | O8     | 2.005(3)     |        |        |              |

**Table S11** Selected bond angles of **2**

| Atom 1 | Atom 2 | Atom 3 | Bond<br>Angles(°) | Atom<br>1 | Atom 2 | Atom<br>3 | Bond<br>Angles(°) |
|--------|--------|--------|-------------------|-----------|--------|-----------|-------------------|
| O7     | Dy1    | O8*    | 67.87(14)         | O2        | Cu1    | N1        | 95.83(17)         |
| O7     | Dy1    | O4*    | 144.58(12)        | O3        | Cu1    | O7        | 84.52(15)         |
| O7     | Dy1    | O9     | 71.97(13)         | N1        | Cu1    | O7        | 170.83(14)        |
| O8     | Dy1*   | O4     | 127.82(14)        | N1        | Cu1    | O3        | 86.37(17)         |
| O8*    | Dy1    | O9     | 76.19(15)         | O8        | Cu2    | O6        | 94.85(16) .       |
| O5*    | Dy1    | O7     | 113.60(13)        | O8        | Cu2    | Cl1       | 84.53(11)         |
| O5     | Dy1*   | O8     | 66.65(13)         | O5        | Cu2    | O8        | 84.23(15) .       |
| O5     | Dy1*   | O4     | 62.32(14)         | O5        | Cu2    | O6        | 161.26(15)        |
| O5*    | Dy1    | O9     | 134.89(16)        | O5        | Cu2    | N2        | 94.79(18)         |
| O5*    | Dy1    | O10    | 85.69(15)         | O5        | Cu2    | Cl1       | 99.21(14)         |
| O5*    | Dy1    | O11    | 140.20(13)        | O6        | Cu2    | Cl1       | 99.33(14)         |
| O3     | Dy1    | O7     | 69.57(12)         | N2        | Cu2    | O8        | 174.17(16)        |
| O3     | Dy1    | O8*    | 113.15(14)        | N2        | Cu2    | O6        | 84.22(18)         |
| O3     | Dy1    | O5*    | 87.21(15)         | N2        | Cu2    | Cl1       | 101.30(15)        |

|     |     |     |            |  |     |     |      |            |
|-----|-----|-----|------------|--|-----|-----|------|------------|
| O3  | Dy1 | O4* | 75.03(13)  |  | O7  | Cu3 | O7*  | 180        |
| O3  | Dy1 | O9  | 132.04(15) |  | O7  | Cu3 | O8*  | 84.53(16)  |
| O3  | Dy1 | O10 | 145.22(14) |  | O7  | Cu3 | O8   | 95.47(16)  |
| O3  | Dy1 | O11 | 82.16(17)  |  | O7  | Cu3 | C11* | 87.35(13)  |
| O9  | Dy1 | O4* | 138.09(13) |  | O7  | Cu3 | C11  | 92.65(13)  |
| O10 | Dy1 | O7  | 143.47(13) |  | O8  | Cu3 | O8*  | 180        |
| O10 | Dy1 | O8* | 95.01(16)  |  | O8  | Cu3 | C11* | 96.16(11)  |
| O10 | Dy1 | O4* | 71.52(15)  |  | O8  | Cu3 | C11  | 83.84(11)  |
| O10 | Dy1 | O9  | 72.67(15)  |  | C11 | Cu3 | C11* | 180        |
| O11 | Dy1 | O7  | 98.34(16)  |  | Cu3 | O7  | Cu1  | 115.72(17) |
| O11 | Dy1 | O8* | 151.83(13) |  | Cu1 | O7  | Dy1  | 99.30(13)  |
| O11 | Dy1 | O4* | 77.87(17)  |  | Cu3 | O8  | Dy1* | 102.68(16) |
| O11 | Dy1 | O9  | 76.16(18)  |  | Cu2 | O8  | Dy1* | 100.81(14) |
| O11 | Dy1 | O10 | 81.80(17)  |  | Cu2 | O8  | Cu3  | 110.79(16) |
| O2  | Cu1 | O7  | 93.12(14)  |  | Cu2 | O5  | Dy1* | 105.10(15) |
| O2  | Cu1 | O3  | 173.63(15) |  | Cu1 | O3  | Dy1  | 106.28(15) |

**Table S12** Intra-molecular hydrogen bonding interactions present in complex **2**

| <b>Interactions</b> | <b>D–H (Å)</b> | <b>D···A (Å)</b> | <b>H···A (Å)</b> | <b>D–H···A (°)</b> |
|---------------------|----------------|------------------|------------------|--------------------|
| O6–H6···O2          | 0.865          | 2.667            | 1.973            | 136.46             |
| O6–H6···O7          | 0.865          | 2.907            | 2.729            | 93.10              |
| O9–H9A···C11        | 0.93           | 3.131            | 2.868            | 97.66              |
| O9–H9B···C15        | 0.93           | 3.085            | 2.717            | 104.54             |
| O10–H10B···C15      | 0.93           | 3.112            | 2.873            | 96.09              |
| O11–H11A···O12      | 0.93           | 2.843            | 2.005            | 148.98             |
| O11–H11B···O25      | 0.93           | 2.685            | 1.976            | 133.57             |

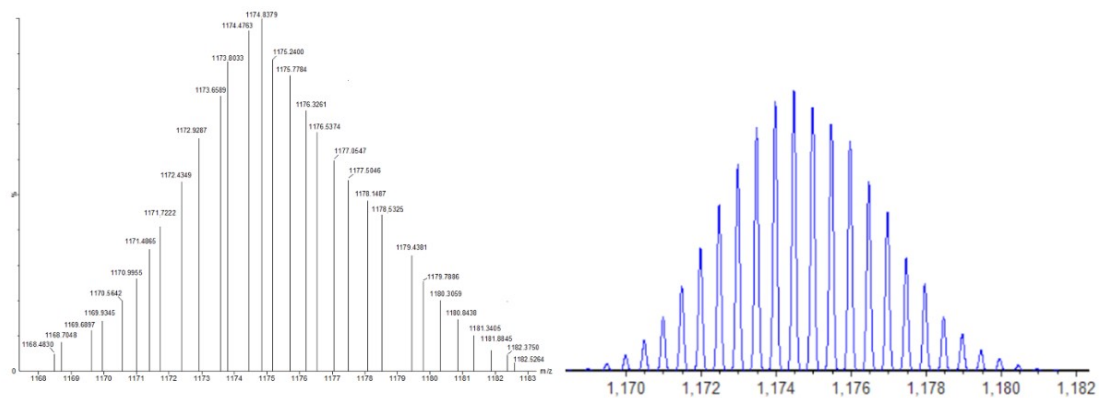

**Fig. S10** Simulated and experimental isotope pattern of the prominent peak for  $[C_{72}H_{92}Cl_2Cu_6Gd_3N_6O_{24}]^{2+}$

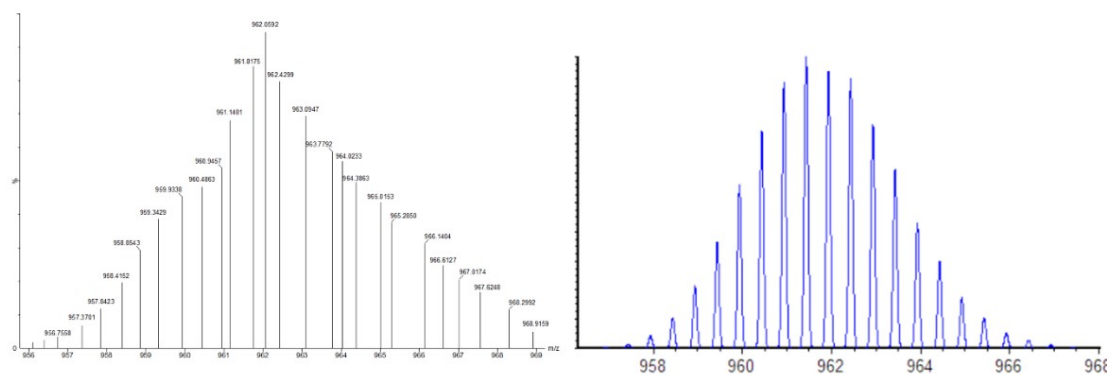

**Fig. S11** Simulated and experimental isotope pattern of the prominent peak for  $[C_{48}H_{74}Cl_4Cu_5Dy_2N_4O_{27}]^{2+}$ .

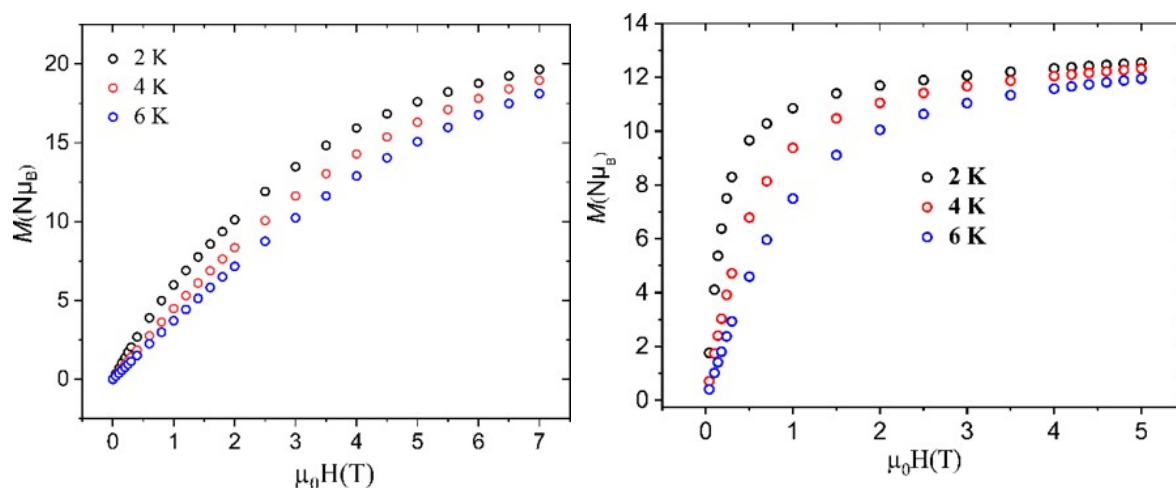

**Fig. S12** Magnetisation vs. field data for **1** (left) and **2** (right) at 2, 4 and 6 K.

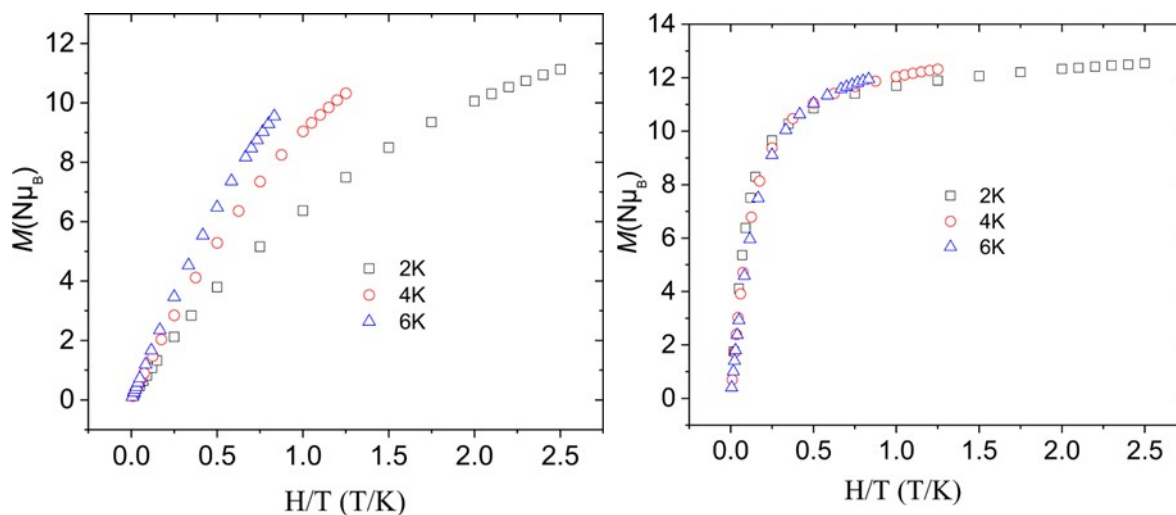

**Fig. S13** Reduced magnetisation vs. field data for **1** (left) and **2** (right) at 2, 4 and 6 K.

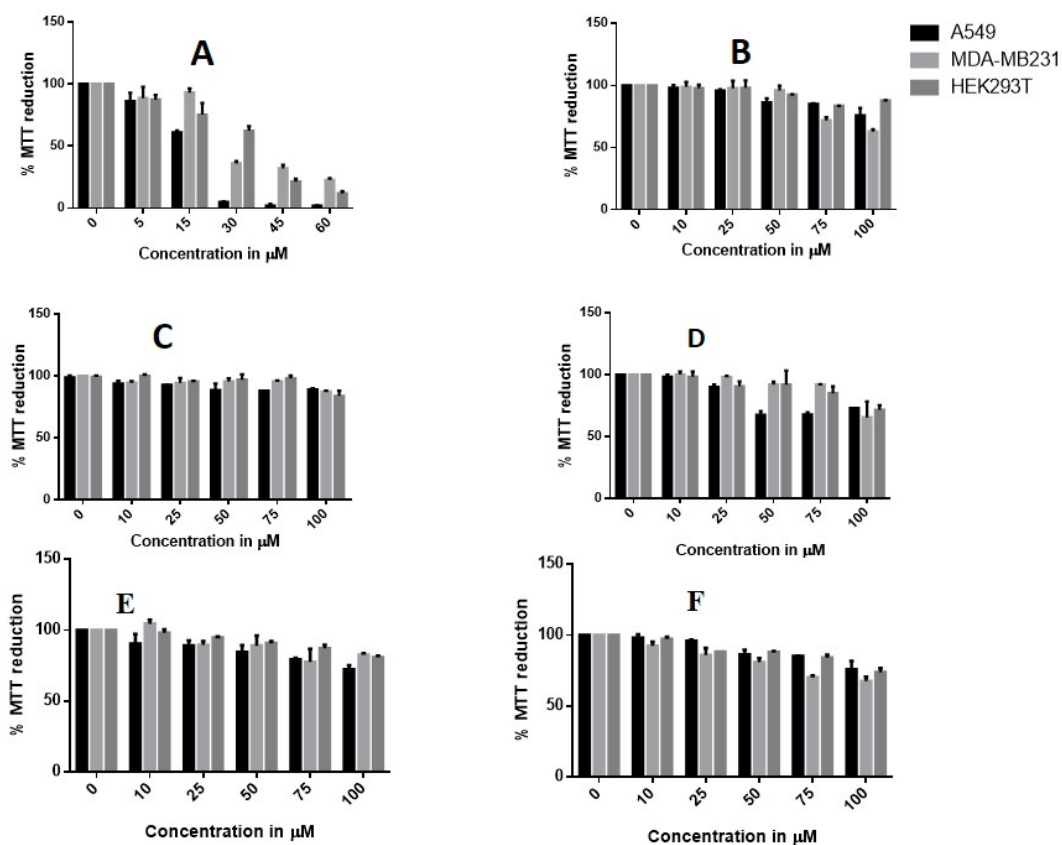

**Fig. S14** Percentage of cell growth as a function of **1** (A), **2** (B), Ligand  $H_2L$  (C),  $Cu(ClO_4)_2 \cdot 6H_2O$  (D),  $DyCl_3 \cdot 6H_2O$  (E) and  $GdCl_3 \cdot 6H_2O$  (F) concentration for A549 cells (black bars), MDA-MB231 cells (light grey bars) and HEK293T (dark grey bars). The experimental number of cells counted was normalized so that the average of all control experiments was considered as 100 %. At least three independent experiments were performed on different days.

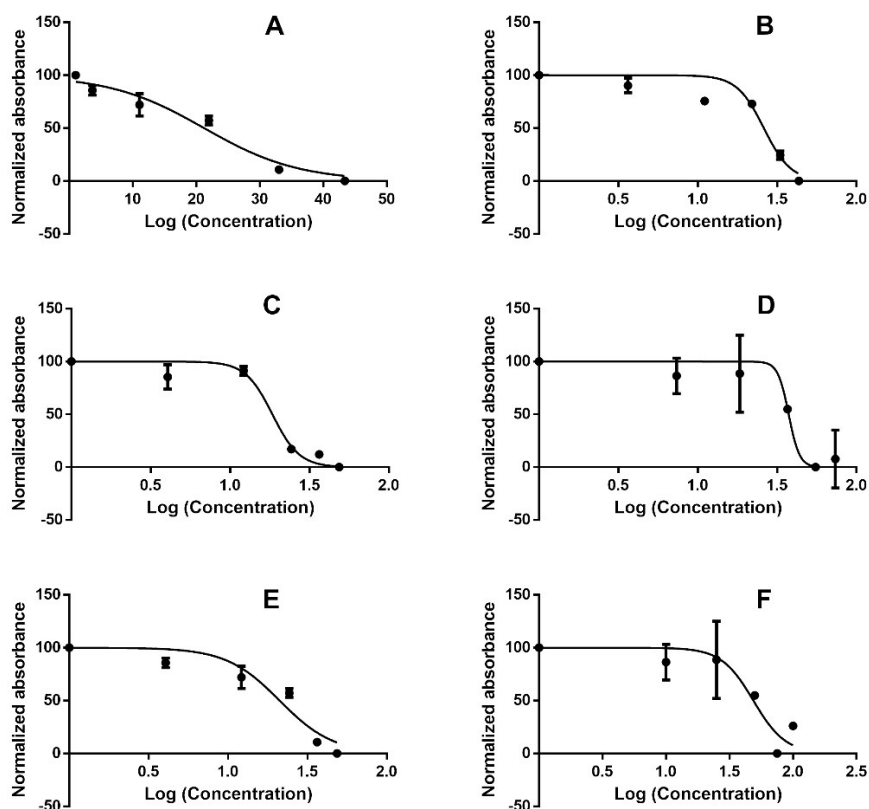

**Fig. S15** Cytotoxic effects of **1** and **2** on A549 (A and B), MD-MB-231 (C and D), HEK293 (E and F) cell lines respectively after 24 h exposure, as assessed by the MTT-dye reduction assay. Each data point represents the mean value.

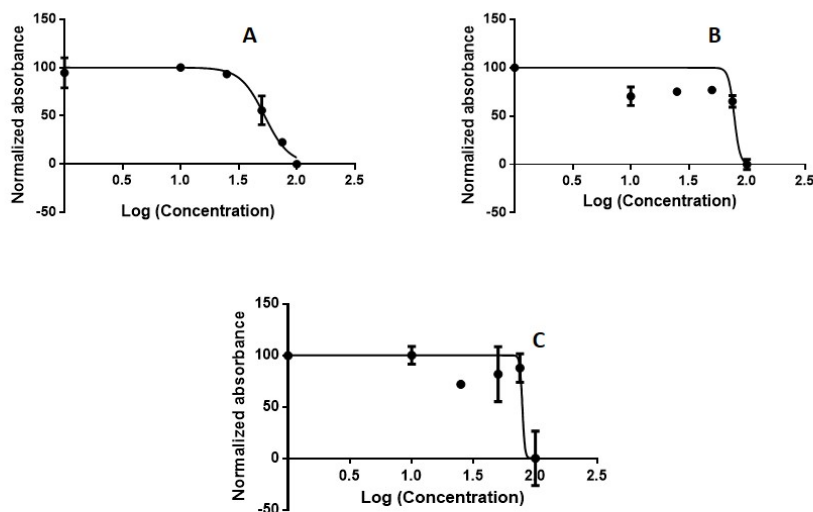

**Fig. S16** Cytotoxic effects of ligand H<sub>2</sub>L on A549 (A), MD-MB-231 (B) and HEK293 (C) cell lines respectively after 24 h exposure, as assessed by the MTT-dye reduction assay. Each data point represents the mean value.

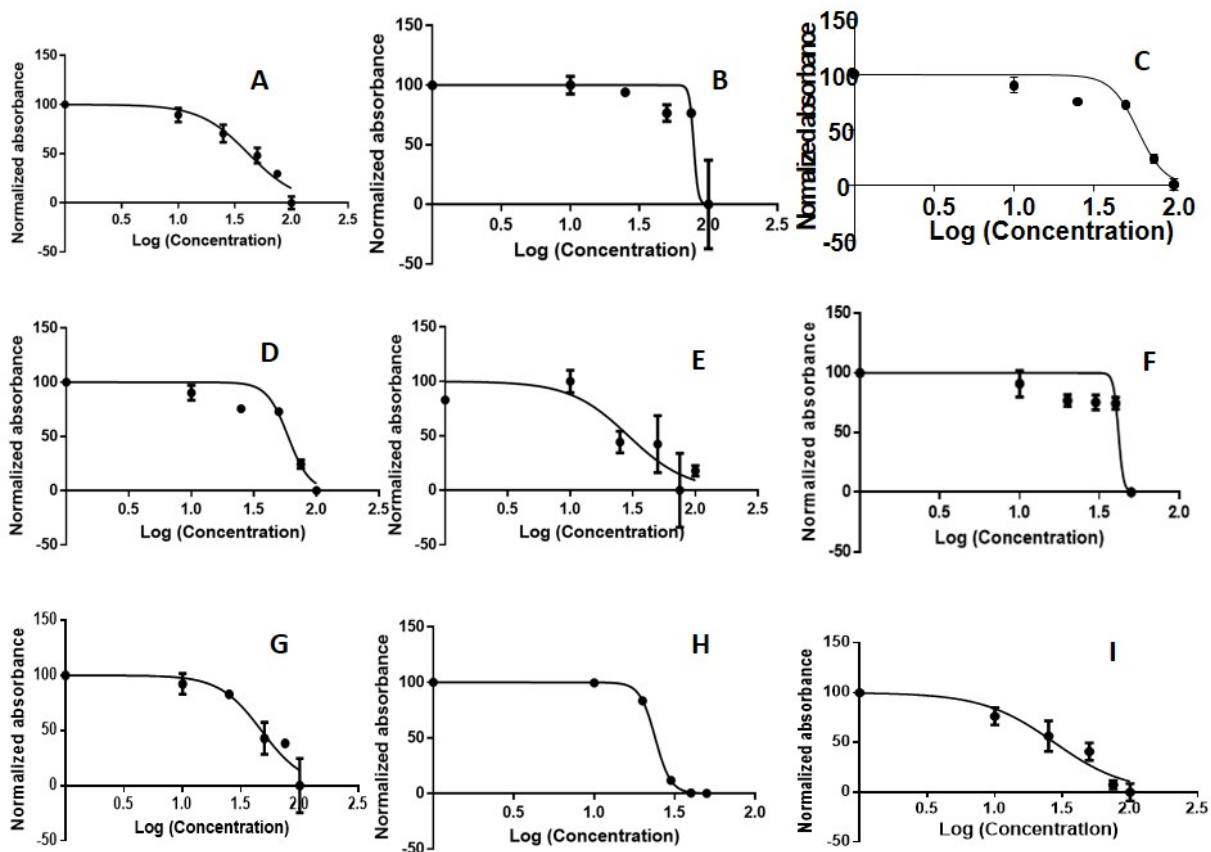

**Fig. S17** Cytotoxic effects of starting metal ion precursors  $\text{Cu}(\text{ClO}_4)_2 \cdot 6\text{H}_2\text{O}$ ,  $\text{DyCl}_3 \cdot 6\text{H}_2\text{O}$  and  $\text{GdCl}_3 \cdot 6\text{H}_2\text{O}$  on A549 (A, D, G), MD-MB-231 (B, E, H), HEK293 (C, F, I) cell lines respectively after 24 h exposure, as assessed by the MTT-dye reduction assay. Each data point represents the mean value.

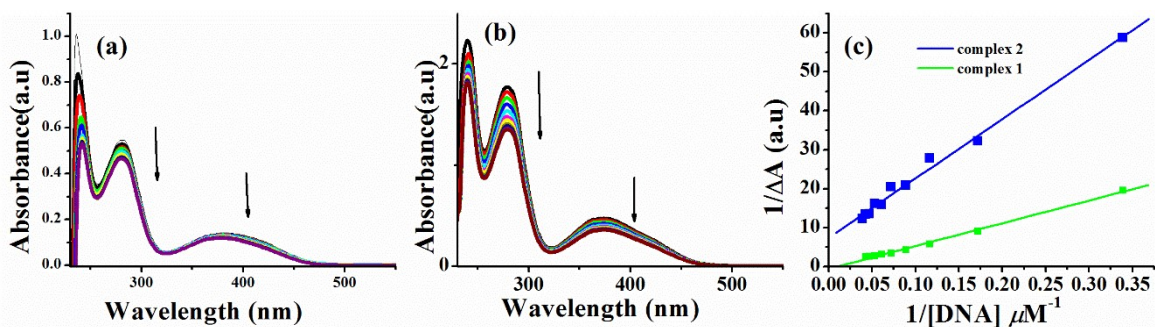

**Fig. S18** Absorption spectra of (a) **1** and (b) **2** (25  $\mu\text{M}$ ) in the absence and presence of incremental *ct*-DNA (0–50  $\mu\text{M}$ ) in 5mM Tris-HCl buffer (50 mMNaCl, *pH* 7.4; (c) Benesi–Hildebrand double reciprocal plot for these complexes.



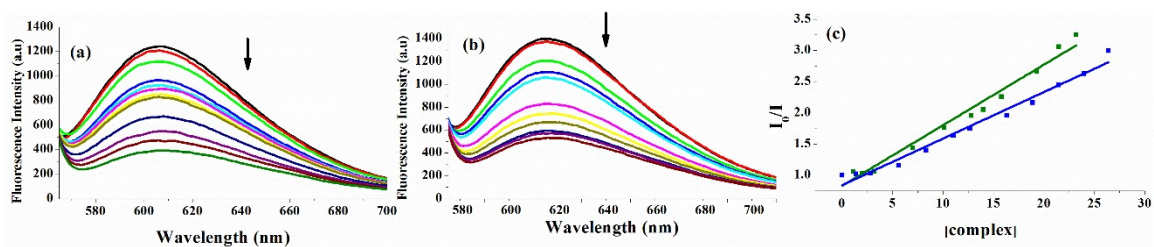

**Fig. S19** Emission spectra ( $\lambda_{\text{ex}}=546$  nm) of EtBr-DNA in Tris-HCl buffer in absence and presence of (a) **1** and (b) **2**. The arrow shows the decrease on an intensity of EtBr-DNA upon increasing the concentration of the complexes from 0 to 33  $\mu\text{M}$ . (c) Stern-Volmer plot for complexes **1** and **2**.

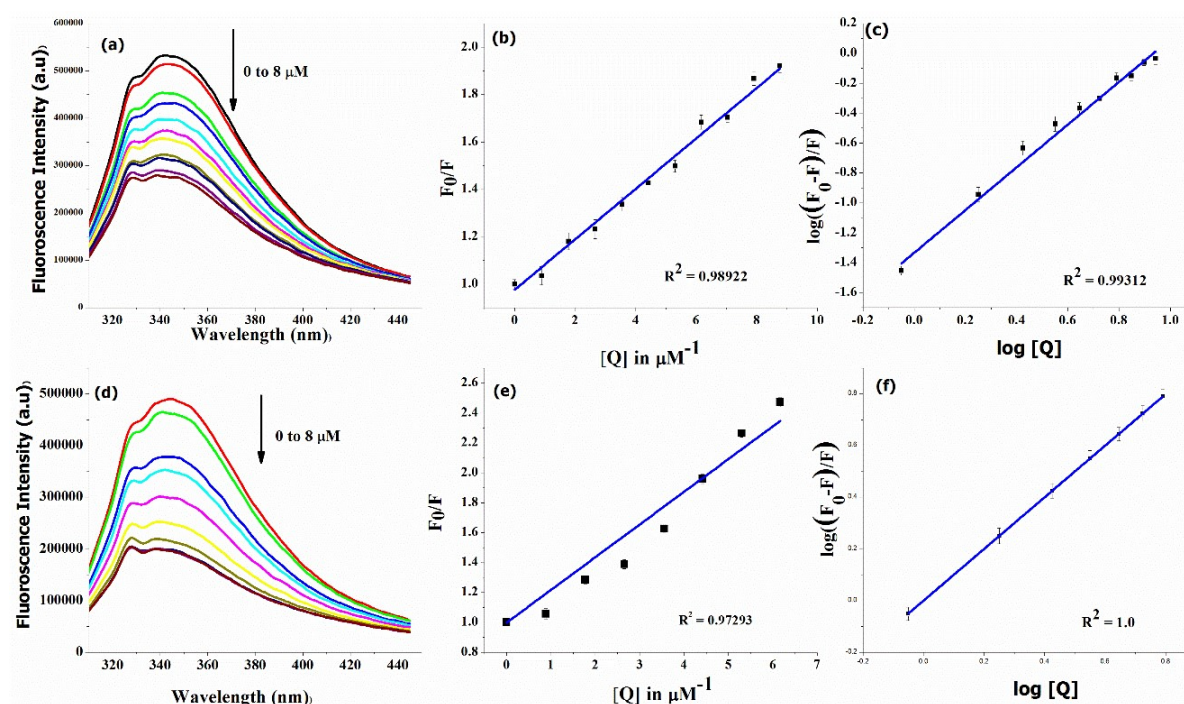

**Fig. S20** (a and d) Fluorescence emission spectra of HSA (2  $\mu\text{M}$ ) in the absence (top most line) and presence of different concentrations (0 to 8  $\mu\text{M}$ ) of **1** and **2**, respectively, in 10 mM phosphate buffer of pH 7.4 at 298 K; (b and e) Stern–Volmer and (c and f) double logarithmic plots of **1** and **2**, respectively.

**Table S13.** Percent decrease in fluorescence intensity of HSA ( $2.0 \times 10^{-6}$  M) after addition of 14  $\mu\text{M}$  of quencher complexes

| Complexes | % decrease |
|-----------|------------|
| <b>1</b>  | 60.2       |
| <b>2</b>  | 48.2       |

## References

- S1. B. S. Furniss, A. J. Hannaford, P. W. G. Smith, A. R. Tatchell, *Vogel's Text book of Practical Organic Chemistry*, 5th ed.; ELBS, Longman: London, U.K., 1989.
- S2. *SAINT, SMART and XPREP*, Siemens Analytical X-ray Instruments Inc., Madison, WI, 1995.
- S3. G. M. Sheldrick, *SHELXS-2014*, Program for Crystal Structure Solution, University of Göttingen, 2014.
- S4. G. M. Sheldrick, *Acta Crystallogr., Sect. A: Found. Crystallogr.*, 2008, **64**, 112–122.
- S5. L. J. J. Farrugia, *WinGX-Version 2014.1*, *Appl. Crystallogr.*, 2012, **45**, 849–854.
- S6. G. M. Sheldrick, *SADABS Software for Empirical Absorption Correction*, University of Göttingen, Institute für Anorganische Chemie der Universität, Göttingen, Germany, 1999-2003.
- S7. O. V. Dolomanov, L. J. Bourhis, R. J. Gildea, J. A. K. Howard and H. J. Puschmann, *J. Appl. Cryst.*, 2009, **42**, 339–341.
- S8. *DIAMOND*, Visual Crystal Structure Information System, version 3.1, Crystal Impact: Bonn, Germany, 2004.
- S9. M. E. Reichmann, S. A. Rice, C. A. Thomas and P. Doty, *J. Am. Chem. Soc.*, 1954, **76**, 3047–3053.
- S10. H. A. Benesi and J. H. Hildebrand, *J. Am. Chem. Soc.*, 1949, **71**, 2703–2707.
- S11. J. R. Lakowicz, *Principles of Fluorescence Spectroscopy*, Springer Publishers, New York, third edn, 2006
- S12. G. Scatchard, *Ann. N. Y. Acad. Sci.*, 1949, **51**, 660–672.
- S13. Z.-Y. Li, Y.-X. Wang, J. Zhu, S.-Q. Liu, G. Xin, J.-J. Zhang, H.-Q. Huang and C.-Y. Duan, *Cryst. Growth Des.* 2013, **13**, 3429–3437.
- S14. J.-L. Liu, W.-Q. Lin, Y.-C. Chen, S. Gómez-Coca, D. Aravena, E. Ruiz, J.-D. Leng and M.-L. Tong, *Chem.-Eur. J.* 2013, **19**, 17567–17577.
- S15. A. Dey, S. Das, M. A. Palacios, E. Colacio and V. Chandrasekhar, *Eur. J. Inorg. Chem.*, 2018, 1645–1654.
- S16. K. Wang, Z.-L. Chen, H.-H. Zou, Z. Zhang, W.-Y. Sun and F.-P. Liang, *Cryst. Growth Des.*, 2015, **15**, 2883–2890.
- S17. X. Wang, C. Li, J. Sun and L. Li, *Dalton Trans.*, 2015, **44**, 18411–18417.
- S18. P. Richardson, K.J. Gagnon, S.J. Teat, G. Lorusso, M. Evangelisti, J. Tang and T.C. Stamatatos, *Cryst. Growth Des.*, 2017, **17** 2486–2497.

- S19. S. K. Langley, N. F. Chilton, B. Moubaraki, T. Hooper, E.K. Brechin, M. Evangelisti and K.S. Murray, *Chem. Sci.*, 2011, **2**, 1166–1169.
- S20. S. K. Langley, B. Moubaraki, C. Tomasi, M. Evangelisti, E. K. Brechin and K. S. Murray, *Inorg. Chem.*, 2014, **53**, 13154–13161.
- S21. G. Xiong, H. Xu, J.-Z. Cui, Q.-L. Wang and B. Zhao, *Dalton Trans.*, 2014, **43** 5639–5642.
- S22. T. N. Hooper, J. Schnack, S. Piligkos, M. Evangelisti and E. K. Brechin, *Angew. Chem. Int. Ed.*, 2012, **51** 4633–4636.
- S23. D. I. Alexandropoulos, L. Cunha-Silva, J. Tang and T. C. Stamatatos, *Dalton Trans.*, 2018, **47**, 11934–11941.
- S24. M. K. Singh, T. Rajeshkumar, R. Kumar, S. K. Singh, G. Rajaraman, *Inorg. Chem.*, 2018, **57**, 1846–1858.
- S25. R. A. Coxall, S. G. Harris, D. K. Henderson, S. Parsons, P. A. Tasker, R. E. P. Winpenny, *J. Chem. Soc. Dalton Trans.*, **2000**, 2349–2356.
- S26. M. Pinsky and D. Avnir, *Inorg. Chem.*, 1998, **37**, 5575–5582.
- S27. D. Casanova, M. Llunell, P. Alemany and S. Alvarez, *Chem. Eur. J.*, 2005, **11**, 1479–1494.
